# Supplementary material for: Identification of a novel alpha‐fetoprotein‐expressing cell population induced by the Jagged1/Notch2 signal in murine fibrotic liver
Source: PubMed Central journal article supplement — Hepatol Commun. 2017 Mar 27;1(3):215–29. doi: 10.1002/hep4.1026 (PMC5721449; doi:10.1002/hep4.1026), 2017-03-27
Supplement: HEP4-1-215-s011.pdf [file HEP4-1-215-s011.pdf]

## Supporting figure legends

### Supporting Figure S1. Induction of AFP-expressing cells in acute liver injury models

Acute liver injury was induced in wild-type mice by a single intraperitoneal injection of 1 mL/kg body weight of CCl<sub>4</sub> (**A, C**) or 100 mg/kg body weight of thioacetamide (**B, D**). After 48 hours, liver samples were excised and subjected to hematoxylin-eosin (*H&E*) staining (**A, B**) or immunofluorescent staining of Jagged1, AFP, and  $\alpha$ SMA with DAPI nuclear staining (**C, D**). *CV*, central vein; *PV*, portal vein. *Scale bars*, 100  $\mu$ m.

### Supporting Figure S2. Efficient ablation of *Jagged1* after poly(I):poly(C) injections into *MxCre*-positive *Jagged1*-floxed mice

Schematic representation (**A, upper**) and an example of PCR detection of floxed (299 bp) and null (333 bp) alleles (**A, lower**) are shown for control and *Jagged1* conditional knockout (*Jag1 cKO*) mice. Exons 4 and 5 of *Jagged1* gene were deleted by the action of Cre recombinase after poly(I):poly(C) injections. Immunofluorescent staining of Jagged1 together with DAPI nuclear staining was performed using fibrotic liver tissues from control (**B**) and *Jag1 cKO* mice (**C**) that had been treated with repeated CCl<sub>4</sub> injections. *Scale bars*, 50  $\mu$ m.

### Supporting Figure S3. Negligible induction of AFP-expressing cells in several models of

## **ductular hyperplasia**

Immunohistochemical detection of CK19 (**A** and **B**), immunofluorescent staining of Jagged1, AFP and  $\alpha$ SMA with DAPI nuclear staining (**C** and **D**), and Sirius red staining (**E** and **F**) were performed using liver specimens obtained from mice fed a DDC diet for 2 weeks (**A**, **C** and **E**) or 2 weeks after ligation of the common bile duct (**B**, **D** and **F**). *Scale bars*, 100  $\mu$ m.

## **Supporting Figure S4. Histological and immunofluorescent analyses of regenerating liver tissues from non-fibrotic control and Jagged1 cKO mice**

Regenerating liver tissues without CCl<sub>4</sub> intoxication were obtained from control (**A** and **C**) and Jagged1 cKO mice (**B** and **D**) on day 2 after partial hepatectomy. Tissue sections were subjected to H&E staining (**A** and **B**) or immunofluorescent staining of  $\alpha$ SMA and AFP with DAPI nuclear staining (**C** and **D**). *Scale bars*, 100  $\mu$ m.

## **Supporting Figure S5. Activation of primary HSC obtained from control and Jagged1 cKO mice**

Parenchymal hepatocytes (Hep) and HSC were isolated from control or Jagged1 cKO mice that had been injected with poly(D):poly(C). (**A**) Efficient *Jagged1* deletion was confirmed by PCR in both cell fractions. After 1-day- (**B**, **D**) or 7-days-culture (**C**, **E**) on type I collagen-coated dishes, primary HSC obtained from control (**B**, **C**) and Jagged1 cKO mice (**D**, **E**) were subjected to

immunofluorescent staining of Jagged1,  $\alpha$ SMA and glial fibrillar acidic protein (*GFAP*), and real time RT-PCR quantifying the amounts of *Acta2* (**F**), *Colla1* (**G**) and *Gfap* (**H**) mRNAs. An asterisk indicates that the difference between groups was statistically significant ( $P < 0.05$ ). Scale bars, 25  $\mu$ m.

**Supporting Figure S6. Changes in gene expression levels of *Sox9* and ductal cell lineage markers in hepatocytes co-cultured with quiescent or activated HSC**

(**A**) Primary hepatocytes isolated from wild-type mice were co-cultured with either quiescent or activated HSC in a mixed condition in the presence of dimethyl sulfoxide (*DMSO*) or 10  $\mu$ M gamma secretase inhibitor (*GSI*). (**B**) Primary hepatocytes isolated from wild-type mice were co-cultured with HSC derived from either control or conditional Jagged1 knockout (*Jag1* cKO) mice. (**C**) Primary hepatocytes isolated from either wild-type or *Notch2* cKO mice were co-cultured with quiescent or activated wild-type HSC. After 36 hours, *Sox9*, *Krt19* and *Hnflb* gene expression levels were quantified by real time RT-PCR. The values indicate the means  $\pm$  SD from 4 samples in each group, and represent 2 or 3 independent experiments. An asterisk indicates that the difference between groups was statistically significant ( $P < 0.01$ ). *N.S.*, not significant.
